# Supplementary material
Source: Springer Nature journal article supplement (https://www.springermedizin.de/resource/supplementary/13024_2012_335_MOESM4_ESM.pdf/9643754)

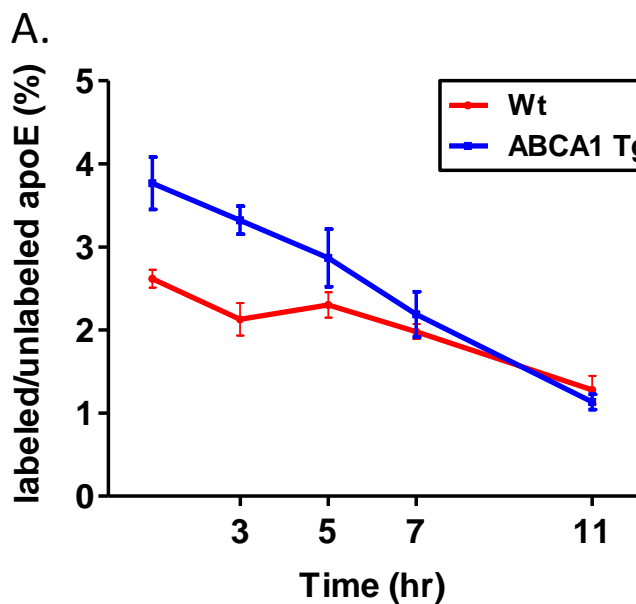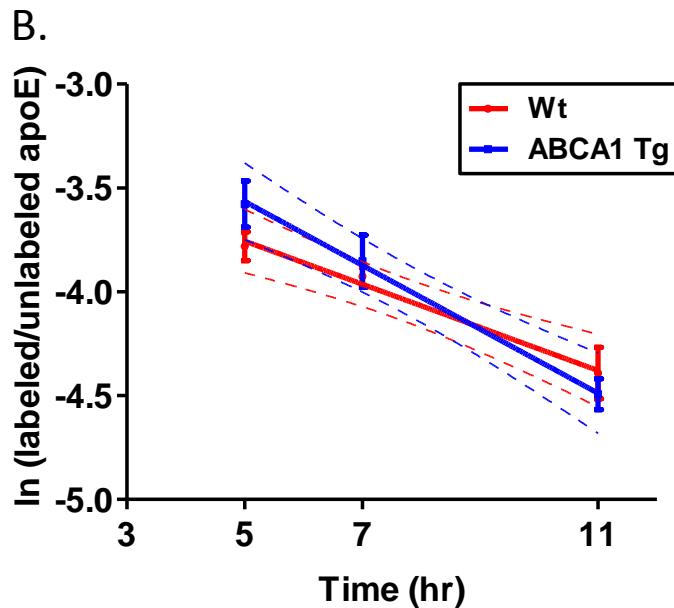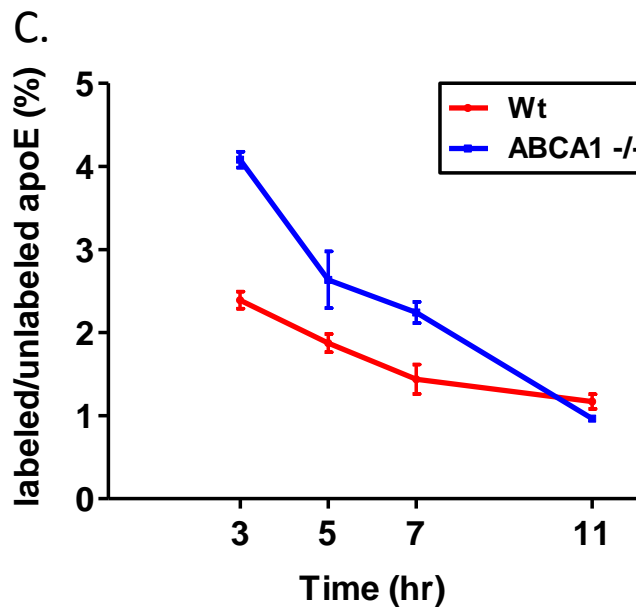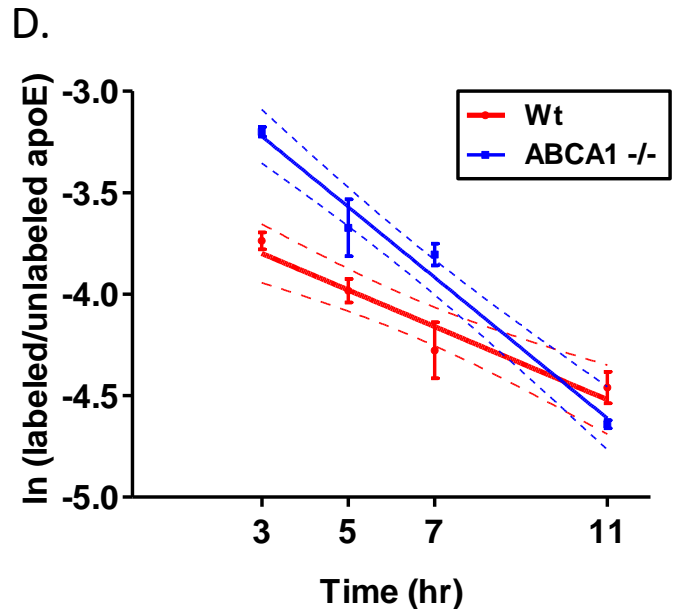

Supplement: MOESM4 [file 9643754]
